# Supplementary material for: A novel in situ N2 generation system assisted by authigenic acid for formation energy enhancement in an oilfield
Source: Royal Society of Chemistry journal article supplement (doi:10.1039/c9ra07934c), 2019-01-01
Supplement: c9ra07934c1.pdf [file c9ra07934c1.pdf]

## A novel in-situ N<sub>2</sub> generation system assisted by authigenic acid used for formation energy enhancement in oilfield

### Supporting Information

Table S1 The parameters of the kinetic equation

| Parameters | $\Delta E$ (kJ/mol) | m      | n      | A                   |
|------------|---------------------|--------|--------|---------------------|
| Value      | 51.28               | 1.3291 | 2.0949 | $7.103 \times 10^7$ |

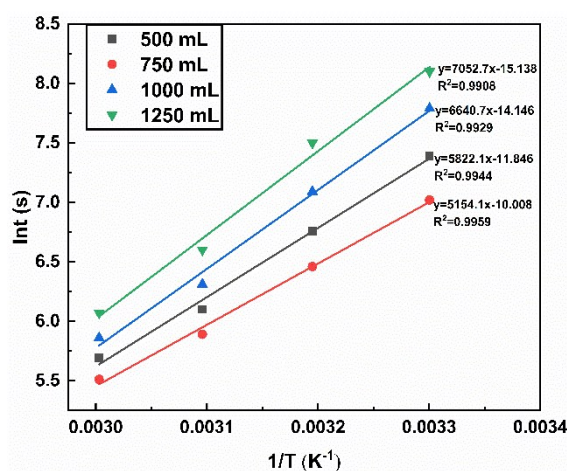

Fig. S1 Linear Relation Graph of Int-1/T

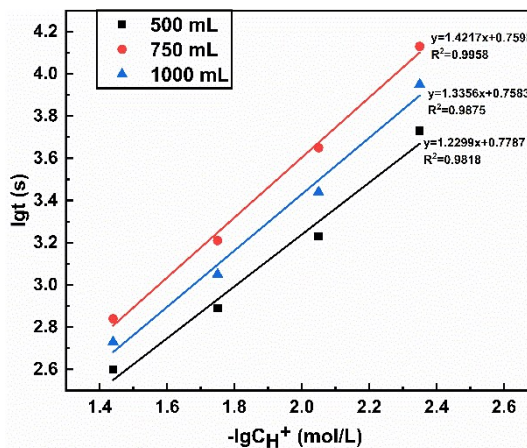

Fig. S2 Linear Relation Graph of lgt(-lgC<sub>H<sup>+</sup></sub>)

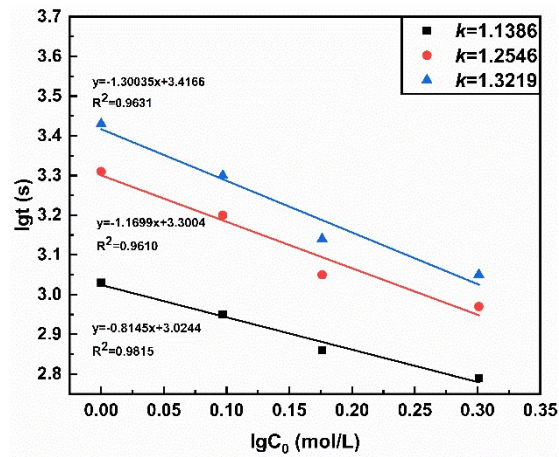

Fig. S3 Linear Relation Graph of  $lgt - \lg C_0$

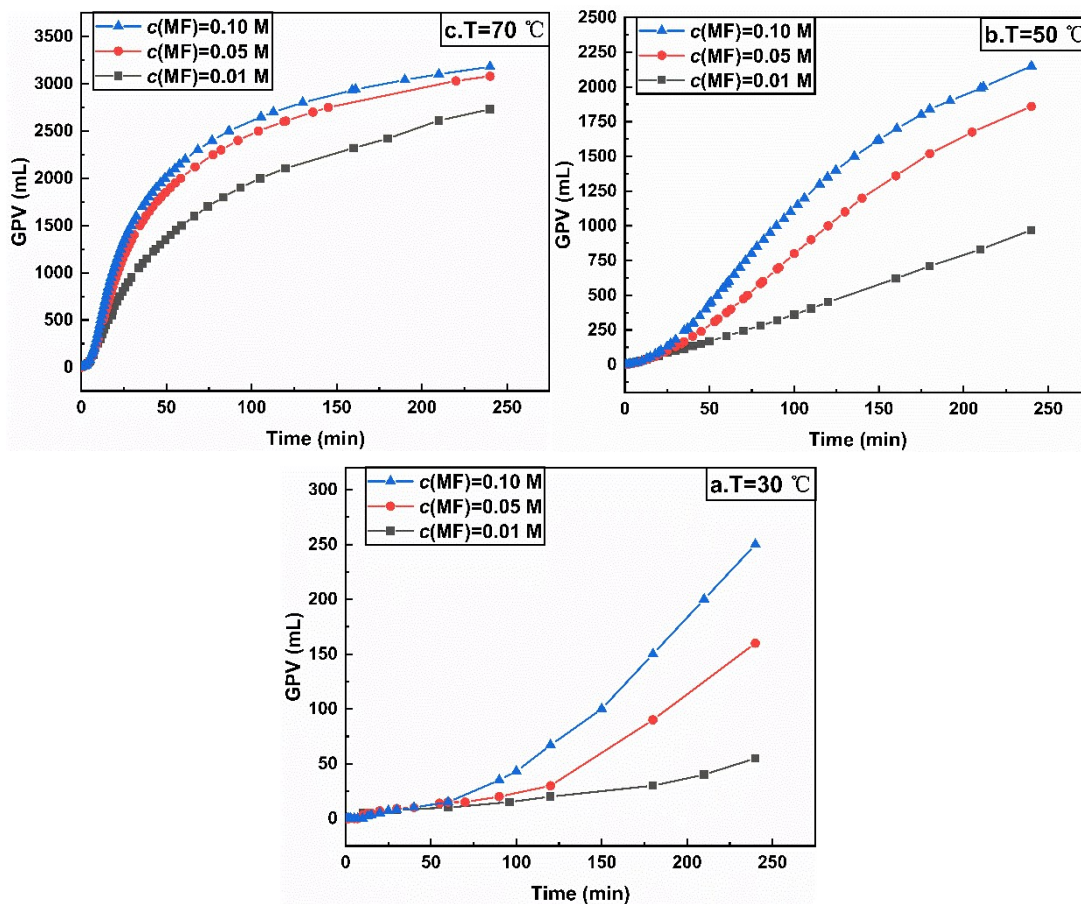

Fig. S4 GPV – time relationship with different concentration of methyl formate(MF) at 30 °C(a), 50 °C(b), 70 °C(c)

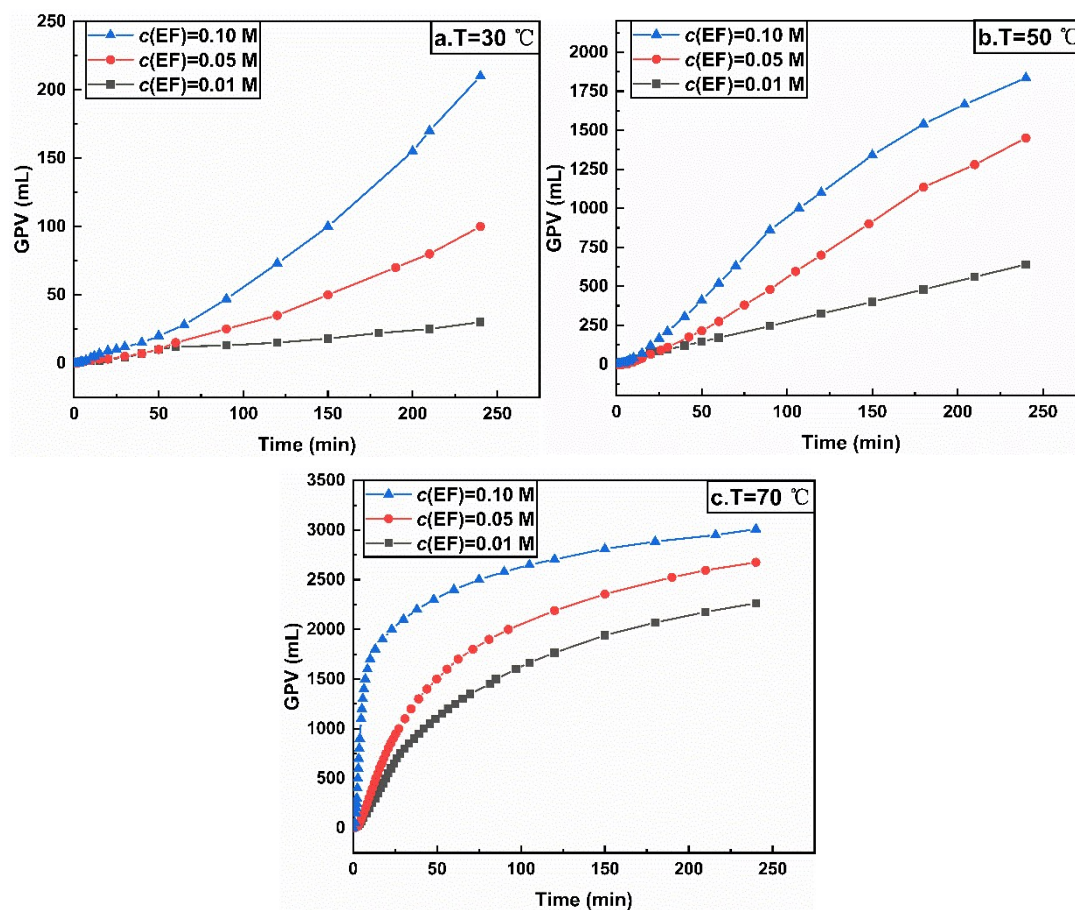

Fig. S5 GPV – time relationship with different concentration of ethyl formate (EF) at 30 °C(a), 50 °C(b), 70 °C(c)

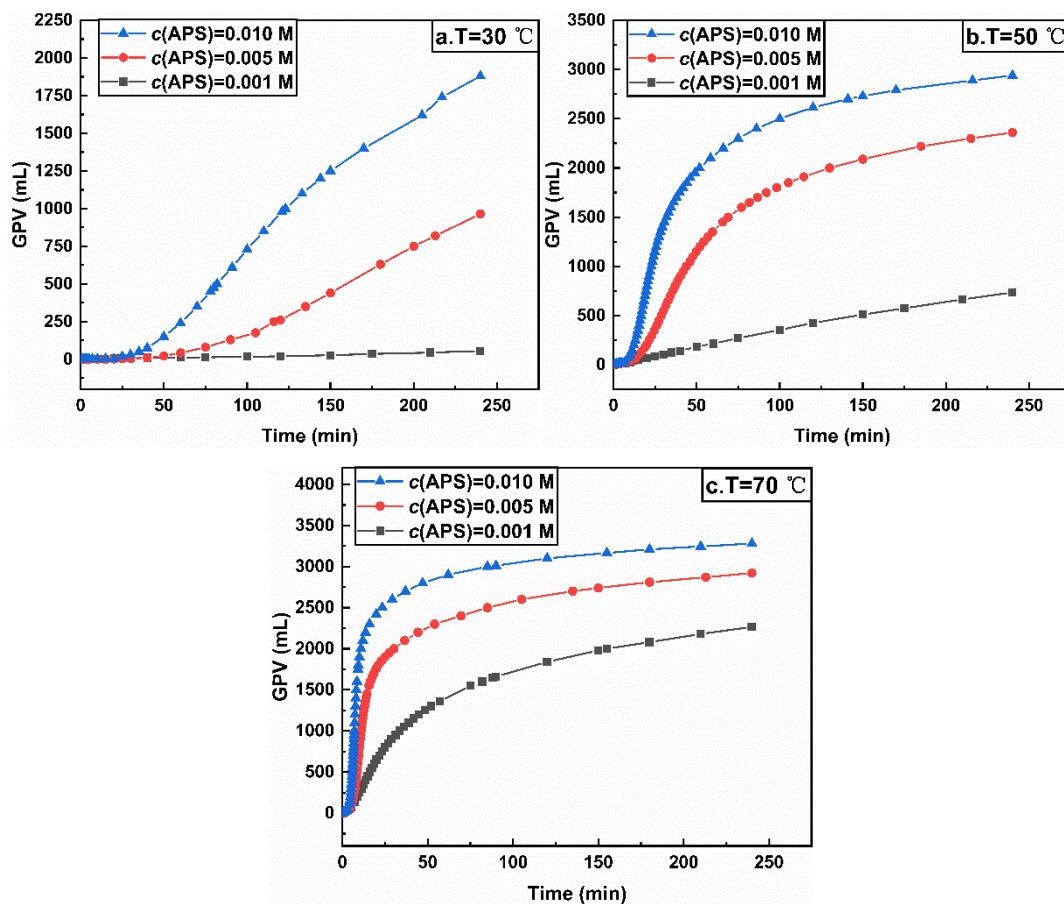

Fig. S6 GPV – time relationship with different concentration of ammonium persulfate(APS) at 30 °C(a), 50 °C(b), 70 °C(c)

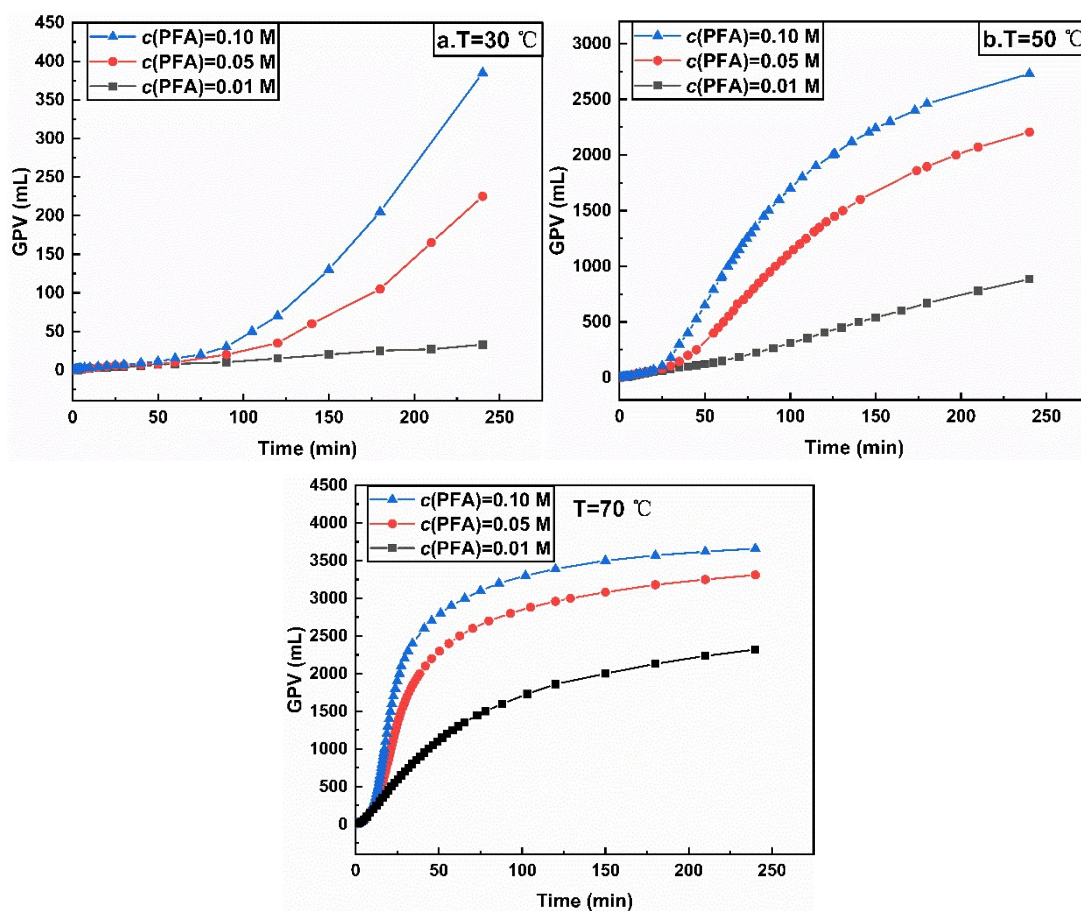

Fig. S7 GPV – time relationship with different concentration of paraformaldehyde(PFA) at 30 °C(a), 50 °C(b), 70 °C(c)
